# Supplementary material for: Using a Dynamic Model to Estimate the Cost-Effectiveness of HPV Vaccination in Iran
Source: MDPI journal article supplement (doi:10.3390/vaccines12040438), 2024-04-18
Supplement: s1 [file s1]

## Supplementary File S1 – Model parameters

### 1. Parameters sources

| Parameter                       | Description                                           |                       |
|---------------------------------|-------------------------------------------------------|-----------------------|
| <b>Demographics</b>             |                                                       |                       |
| Pop_frac                        | Population composition                                | [1]                   |
| Birth                           | Normal birthrate                                      | [2]                   |
| Mortality                       | Background mortality rate                             | [3]                   |
| <b>Contact matrix</b>           |                                                       | [4,5] and assumptions |
| P_CC                            | Probability on cervical cancer after HPV              | Calibration           |
| I_dur                           | Duration of infectious period (years)                 | [6]                   |
| Lat_CC                          | CC latency (years)                                    | [7]                   |
| <b>Vaccination and fatality</b> |                                                       |                       |
| Vac_Uptake                      | Vaccination uptake                                    | Assumption            |
| Vac_Eff_Inf                     | Vaccination effectiveness on infection                | [8]                   |
| f_CCT                           | Fraction of cervical cancer patients treated          | [9]                   |
| CCT_D                           | Fraction of treated cervical cancer patients to die   | [10]                  |
| CCU_D                           | Fraction of untreated cervical cancer patients to die | Assumption            |
| CCT_dur                         | Duration with cervical cancer treated                 | [10]                  |
| CCU_dur                         | Duration with cervical cancer untreated               | Assumption            |
| Im_dur                          | Immunity duration (years)                             | Assumption            |
| <b>Economics</b>                |                                                       |                       |
| Rf                              | Financial discount rate                               | [11]                  |
| Re                              | Effect QALY discount rate                             | [11]                  |
| CoV                             | Cost of vaccination                                   | [12]                  |
| Utility                         | Utility healthy                                       | [13]                  |
| Ut_CC                           | Relative utility cervical cancer                      | [12,14]               |
| Ut_UT                           | Relative utility untreated vs treated                 | Assumption            |
| CoCaseCCt                       | Cost per CC case treated                              | [12]                  |

## 2. Parameter Values—Men

| Parameter                | Description                            | 0 (0-9)   | 1 (10-14) | 2 (15-19) | 3 (20-24) | 4 (25-29) | 5 (30-34) | 6 (35-39) | 7 (40-44) | 8 (45-49) | 9 (50-54) | 10 (55-59) | 11 (60-64) | 12 (65-69) | 13 (70-74) | 14 (75-79) | 15 (80+)  |
|--------------------------|----------------------------------------|-----------|-----------|-----------|-----------|-----------|-----------|-----------|-----------|-----------|-----------|------------|------------|------------|------------|------------|-----------|
| Demographics             |                                        |           |           |           |           |           |           |           |           |           |           |            |            |            |            |            |           |
| Pop_frac                 |                                        | 0.084     | 0.038     | 0.033     | 0.032     | 0.039     | 0.050     | 0.051     | 0.041     | 0.032     | 0.028     | 0.023      | 0.020      | 0.015      | 0.010      | 0.005      | 0.004     |
| Birth                    | Normal birthrate                       |           |           |           |           |           |           |           |           |           |           |            |            |            |            |            |           |
| Mortality                | Background Mortality Rate              | 0.0030223 | 0.0002794 | 0.0007386 | 0.0009734 | 0.0009185 | 0.0009798 | 0.0011539 | 0.0015126 | 0.0021391 | 0.0034809 | 0.005612   | 0.0086434  | 0.0129964  | 0.0201837  | 0.0354535  | 0.0849798 |
| Sexual partners matrix   |                                        |           |           |           |           |           |           |           |           |           |           |            |            |            |            |            |           |
| C_M_1                    | Contacts of A with Age group Partn     | -         | 0         | 0         | 0         | 0         | 0         | 0         | 0         | 0         | 0         | 0          | 0          | 0          | 0          | 0          | 0         |
| C_M_2                    |                                        | 0         | 0         | 0         | 0         | 0         | 0         | 0         | 0         | 0         | 0         | 0          | 0          | 0          | 0          | 0          | 0         |
| C_M_3                    |                                        | 0         | 0         | 0         | 0         | 0         | 0         | 0         | 0         | 0         | 0         | 0          | 0          | 0          | 0          | 0          | 0         |
| C_M_4                    |                                        | 0         | 0         | 0         | 0         | 0         | 0         | 0         | 0         | 0         | 0         | 0          | 0          | 0          | 0          | 0          | 0         |
| C_M_5                    |                                        | 0         | 0         | 0         | 0         | 0         | 0         | 0         | 0         | 0         | 0         | 0          | 0          | 0          | 0          | 0          | 0         |
| C_M_6                    |                                        | 0         | 0         | 0         | 0         | 0         | 0         | 0         | 0         | 0         | 0         | 0          | 0          | 0          | 0          | 0          | 0         |
| C_M_7                    |                                        | 0         | 0         | 0         | 0         | 0         | 0         | 0         | 0         | 0         | 0         | 0          | 0          | 0          | 0          | 0          | 0         |
| C_M_8                    |                                        | 0         | 0         | 0         | 0         | 0         | 0         | 0         | 0         | 0         | 0         | 0          | 0          | 0          | 0          | 0          | 0         |
| C_M_9                    |                                        | 0         | 0         | 0         | 0         | 0         | 0         | 0         | 0         | 0         | 0         | 0          | 0          | 0          | 0          | 0          | 0         |
| C_M_10                   |                                        | 0         | 0         | 0         | 0         | 0         | 0         | 0         | 0         | 0         | 0         | 0          | 0          | 0          | 0          | 0          | 0         |
| C_M_11                   |                                        | 0         | 0         | 0         | 0         | 0         | 0         | 0         | 0         | 0         | 0         | 0          | 0          | 0          | 0          | 0          | 0         |
| C_M_12                   |                                        | 0         | 0         | 0         | 0         | 0         | 0         | 0         | 0         | 0         | 0         | 0          | 0          | 0          | 0          | 0          | 0         |
| C_M_13                   |                                        | 0         | 0         | 0         | 0         | 0         | 0         | 0         | 0         | 0         | 0         | 0          | 0          | 0          | 0          | 0          | 0         |
| C_M_14                   |                                        | 0         | 0         | 0         | 0         | 0         | 0         | 0         | 0         | 0         | 0         | 0          | 0          | 0          | 0          | 0          | 0         |
| C_M_15                   |                                        | 0         | 0         | 0         | 0         | 0         | 0         | 0         | 0         | 0         | 0         | 0          | 0          | 0          | 0          | 0          | 0         |
| C_M_16                   |                                        | 0         | 0         | 0         | 0         | 0         | 0         | 0         | 0         | 0         | 0         | 0          | 0          | 0          | 0          | 0          | 0         |
| C_F_1                    | Contacts of A with Age group Partn     | 0         | 0         | 0         | 0         | 0         | 0         | 0         | 0         | 0         | 0         | 0          | 0          | 0          | 0          | 0          | 0         |
| C_F_2                    |                                        | 0         | 3.5       | 0         | 0         | 0         | 0         | 0         | 0         | 0         | 0         | 0          | 0          | 0          | 0          | 0          | 0         |
| C_F_3                    |                                        | 0         | 11.403    | 11.17494  | 0.22806   | 0         | 0         | 0         | 0         | 0         | 0         | 0          | 0          | 0          | 0          | 0          | 0         |
| C_F_4                    |                                        | 0         | 0         | 14.13972  | 27.3672   | 4.10508   | 0         | 0         | 0         | 0         | 0         | 0          | 0          | 0          | 0          | 0          | 0         |
| C_F_5                    |                                        | 0         | 0         | 0         | 11.403    | 26.91108  | 6.8418    | 0         | 0         | 0         | 0         | 0          | 0          | 0          | 0          | 0          | 0         |
| C_F_6                    |                                        | 0         | 0         | 0         | 0         | 6.8418    | 26.91108  | 10.94688  | 0.45612   | 0         | 0         | 0          | 0          | 0          | 0          | 0          | 0         |
| C_F_7                    |                                        | 0         | 0         | 0         | 0         | 0         | 6.8418    | 26.91108  | 10.94688  | 0.45612   | 0         | 0          | 0          | 0          | 0          | 0          | 0         |
| C_F_8                    |                                        | 0         | 0         | 0         | 0         | 0         | 0         | 6.8418    | 26.91108  | 10.94688  | 0.45612   | 0          | 0          | 0          | 0          | 0          | 0         |
| C_F_9                    |                                        | 0         | 0         | 0         | 0         | 0         | 0         | 0         | 6.8418    | 26.91108  | 10.94688  | 0.45612    | 0          | 0          | 0          | 0          | 0         |
| C_F_10                   |                                        | 0         | 0         | 0         | 0         | 0         | 0         | 0         | 0         | 6.8418    | 26.91108  | 10.94688   | 0.45612    | 0          | 0          | 0          | 0         |
| C_F_11                   |                                        | 0         | 0         | 0         | 0         | 0         | 0         | 0         | 0         | 0         | 6.8418    | 26.91108   | 10.94688   | 0.45612    | 0          | 0          | 0         |
| C_F_12                   |                                        | 0         | 0         | 0         | 0         | 0         | 0         | 0         | 0         | 0         | 0         | 3.0681     | 12.06786   | 4.90896    | 0.20454    | 0          | 0         |
| C_F_13                   |                                        | 0         | 0         | 0         | 0         | 0         | 0         | 0         | 0         | 0         | 0         | 0          | 3.0681     | 12.06786   | 4.90896    | 0.20454    | 0         |
| C_F_14                   |                                        | 0         | 0         | 0         | 0         | 0         | 0         | 0         | 0         | 0         | 0         | 0          | 0          | 2.0804     | 8.1829067  | 3.32864    | 0.1386933 |
| C_F_15                   |                                        | 0         | 0         | 0         | 0         | 0         | 0         | 0         | 0         | 0         | 0         | 0          | 0          | 0          | 1.0927     | 4.2979533  | 1.74832   |
| C_F_16                   |                                        | 0         | 0         | 0         | 0         | 0         | 0         | 0         | 0         | 0         | 0         | 0          | 0          | 0          | 0          | 0.105      | 0.413     |
| P_CC                     | Probability on cervical cancer after I | 0         | 0         | 0         | 0         | 0         | 0         | 0         | 0         | 0         | 0         | 0          | 0          | 0          | 0          | 0          | 0         |
| I_dur                    | Duration of infectious period (years)  | 1.5       |           |           |           |           |           |           |           |           |           |            |            |            |            |            |           |
| Lat_CC                   | CC Latency (years)                     | 20        | 20        | 20        | 20        | 20        | 20        | 20        | 20        | 20        | 20        | 20         | 20         | 20         | 20         | 20         | 20        |
| Vaccination and fatality |                                        |           |           |           |           |           |           |           |           |           |           |            |            |            |            |            |           |
| Vac_Uptake               | Vaccination uptake                     | 0         | 0         | 0         | 0         | 0         | 0         | 0         | 0         | 0         | 0         | 0          | 0          | 0          | 0          | 0          | 0         |
| Vac_Eff_Inf              | Vaccination effectiveness on infecti   | 0.99      | 0.99      | 0.99      | 0.99      | 0.99      | 0.99      | 0.99      | 0.99      | 0.99      | 0.99      | 0.99       | 0.99       | 0.99       | 0.99       | 0.99       | 0.99      |
| f_CCT                    | Fraction of Cervical Cancer patients   | 0         | 0         | 0         | 0         | 0         | 0         | 0         | 0         | 0         | 0         | 0          | 0          | 0          | 0          | 0          | 0         |
| CCT_D                    | Fraction of treated Cervical Cancer    | 0         | 0         | 0         | 0         | 0         | 0         | 0         | 0         | 0         | 0         | 0          | 0          | 0          | 0          | 0          | 0         |
| CCU_D                    | Fraction of untreated Cervical Canc    | 0         | 0         | 0         | 0         | 0         | 0         | 0         | 0         | 0         | 0         | 0          | 0          | 0          | 0          | 0          | 0         |
| CCT_dur                  | Duration with cervical cancer treat    | 1         | 1         | 1         | 1         | 1         | 1         | 1         | 1         | 1         | 1         | 1          | 1          | 1          | 1          | 1          | 1         |
| CCU_dur                  | Duration with cervical cancer untrea   | 1         | 1         | 1         | 1         | 1         | 1         | 1         | 1         | 1         | 1         | 1          | 1          | 1          | 1          | 1          | 1         |
| Im_dur                   | Immunity duration (years)              | 10        |           |           |           |           |           |           |           |           |           |            |            |            |            |            |           |
| Economics                |                                        |           |           |           |           |           |           |           |           |           |           |            |            |            |            |            |           |
| Rf                       | Financial discount rate                | 3.5%      |           |           |           |           |           |           |           |           |           |            |            |            |            |            |           |
| Re                       | effect QALY discount rate              | 3.5%      |           |           |           |           |           |           |           |           |           |            |            |            |            |            |           |
| CoV                      | Cost of Vaccination                    | 152.00    |           |           |           |           |           |           |           |           |           |            |            |            |            |            |           |
| CoD                      | Cost of premature death                |           |           |           |           |           |           |           |           |           |           |            |            |            |            |            |           |
| CoPLL                    | Cost of productivity loss              |           |           |           |           |           |           |           |           |           |           |            |            |            |            |            |           |
| Utility                  | Utility healthy                        | 1         | 1         | 1         | 0.99      | 0.98      | 0.97      | 0.96      | 0.95      | 0.93      | 0.91      | 0.89       | 0.87       | 0.84       | 0.81       | 0.78       | 0.75      |
| Ut_CC                    | Rel Utility cervical cancer            | 0.62      |           |           |           |           |           |           |           |           |           |            |            |            |            |            |           |
| Ut_UT                    | Relative utility untreated vs treated  | 0.5       |           |           |           |           |           |           |           |           |           |            |            |            |            |            |           |
| CoCaseCCT                | Cost per CC case treated               | 26250     |           |           |           |           |           |           |           |           |           |            |            |            |            |            |           |

3. Parameter Values—Women

|                          |                                               | 0 (0-9)   | 1 (10-14) | 2 (15-19) | 3 (20-24) | 4 (25-29) | 5 (30-34) | 6 (35-39) | 7 (40-44) | 8 (45-49) | 9 (50-54) | 10 (55-59) | 11 (60-64) | 12 (65-69) | 13 (70-74) | 14 (75-79) | 15 (80+)  |
|--------------------------|-----------------------------------------------|-----------|-----------|-----------|-----------|-----------|-----------|-----------|-----------|-----------|-----------|------------|------------|------------|------------|------------|-----------|
| Demographics             |                                               |           |           |           |           |           |           |           |           |           |           |            |            |            |            |            |           |
| Pop_frac                 |                                               | 0.080     | 0.036     | 0.032     | 0.031     | 0.038     | 0.048     | 0.050     | 0.040     | 0.031     | 0.027     | 0.023      | 0.019      | 0.015      | 0.011      | 0.007      | 0.007     |
| Birth                    | Normal birthrate (set also by forecast sheet) |           |           |           |           |           |           |           |           |           |           |            |            |            |            |            |           |
| Mortality                | Background Mortality Rate                     | 0.0027194 | 0.0002121 | 0.0003177 | 0.0003439 | 0.0003883 | 0.0004366 | 0.0005375 | 0.0007434 | 0.001126  | 0.0018205 | 0.0030565  | 0.0054458  | 0.0090769  | 0.0158956  | 0.0312893  | 0.0870697 |
| AgeWidth                 | Width in years of the age group               | 10        | 5         | 5         | 5         | 5         | 5         | 5         | 5         | 5         | 5         | 5          | 5          | 5          | 5          | 5          | 5         |
| Sexual partners matrix   |                                               |           |           |           |           |           |           |           |           |           |           |            |            |            |            |            |           |
| C_M_1                    | Contacts of A with Age group Partn            | 0         | 0         | 0         | 0         | 0         | 0         | 0         | 0         | 0         | 0         | 0          | 0          | 0          | 0          | 0          | 0         |
| C_M_2                    |                                               | 0         | 4         | 13.032    | 0         | 0         | 0         | 0         | 0         | 0         | 0         | 0          | 0          | 0          | 0          | 0          | 0         |
| C_M_3                    |                                               | 0         | 0         | 12.77136  | 16.15968  | 0         | 0         | 0         | 0         | 0         | 0         | 0          | 0          | 0          | 0          | 0          | 0         |
| C_M_4                    |                                               | 0         | 0         | 0.26064   | 31.2768   | 13.032    | 0         | 0         | 0         | 0         | 0         | 0          | 0          | 0          | 0          | 0          | 0         |
| C_M_5                    |                                               | 0         | 0         | 0         | 4.69152   | 30.75552  | 7.8192    | 0         | 0         | 0         | 0         | 0          | 0          | 0          | 0          | 0          | 0         |
| C_M_6                    |                                               | 0         | 0         | 0         | 0         | 7.8192    | 30.75552  | 7.8192    | 0         | 0         | 0         | 0          | 0          | 0          | 0          | 0          | 0         |
| C_M_7                    |                                               | 0         | 0         | 0         | 0         | 0         | 12.51072  | 30.75552  | 7.8192    | 0         | 0         | 0          | 0          | 0          | 0          | 0          | 0         |
| C_M_8                    |                                               | 0         | 0         | 0         | 0         | 0         | 0.52128   | 12.51072  | 30.75552  | 7.8192    | 0         | 0          | 0          | 0          | 0          | 0          | 0         |
| C_M_9                    |                                               | 0         | 0         | 0         | 0         | 0         | 0         | 0.52128   | 12.51072  | 30.75552  | 7.8192    | 0          | 0          | 0          | 0          | 0          | 0         |
| C_M_10                   |                                               | 0         | 0         | 0         | 0         | 0         | 0         | 0         | 0.52128   | 12.51072  | 30.75552  | 7.8192     | 0          | 0          | 0          | 0          | 0         |
| C_M_11                   |                                               | 0         | 0         | 0         | 0         | 0         | 0         | 0         | 0         | 0.52128   | 12.51072  | 30.75552   | 3.5064     | 0          | 0          | 0          | 0         |
| C_M_12                   |                                               | 0         | 0         | 0         | 0         | 0         | 0         | 0         | 0         | 0         | 0.52128   | 12.51072   | 13.79184   | 3.5064     | 0          | 0          | 0         |
| C_M_13                   |                                               | 0         | 0         | 0         | 0         | 0         | 0         | 0         | 0         | 0         | 0         | 0.52128    | 5.61024    | 13.79184   | 2.3776     | 0          | 0         |
| C_M_14                   |                                               | 0         | 0         | 0         | 0         | 0         | 0         | 0         | 0         | 0         | 0         | 0          | 0.23376    | 5.61024    | 9.3518933  | 1.2488     | 0         |
| C_M_15                   |                                               | 0         | 0         | 0         | 0         | 0         | 0         | 0         | 0         | 0         | 0         | 0          | 0          | 0.23376    | 3.80416    | 4.9119467  | 0.12      |
| C_M_16                   |                                               | 0         | 0         | 0         | 0         | 0         | 0         | 0         | 0         | 0         | 0         | 0          | 0          | 0          | 0.1585067  | 1.99808    | 0.472     |
| C_F_1                    | Contacts of A with Age group Partn            | 0         | 0         | 0         | 0         | 0         | 0         | 0         | 0         | 0         | 0         | 0          | 0          | 0          | 0          | 0          | 0         |
| C_F_2                    |                                               | 0         | 0         | 0         | 0         | 0         | 0         | 0         | 0         | 0         | 0         | 0          | 0          | 0          | 0          | 0          | 0         |
| C_F_3                    |                                               | 0         | 0         | 0         | 0         | 0         | 0         | 0         | 0         | 0         | 0         | 0          | 0          | 0          | 0          | 0          | 0         |
| C_F_4                    |                                               | 0         | 0         | 0         | 0         | 0         | 0         | 0         | 0         | 0         | 0         | 0          | 0          | 0          | 0          | 0          | 0         |
| C_F_5                    |                                               | 0         | 0         | 0         | 0         | 0         | 0         | 0         | 0         | 0         | 0         | 0          | 0          | 0          | 0          | 0          | 0         |
| C_F_6                    |                                               | 0         | 0         | 0         | 0         | 0         | 0         | 0         | 0         | 0         | 0         | 0          | 0          | 0          | 0          | 0          | 0         |
| C_F_7                    |                                               | 0         | 0         | 0         | 0         | 0         | 0         | 0         | 0         | 0         | 0         | 0          | 0          | 0          | 0          | 0          | 0         |
| C_F_8                    |                                               | 0         | 0         | 0         | 0         | 0         | 0         | 0         | 0         | 0         | 0         | 0          | 0          | 0          | 0          | 0          | 0         |
| C_F_9                    |                                               | 0         | 0         | 0         | 0         | 0         | 0         | 0         | 0         | 0         | 0         | 0          | 0          | 0          | 0          | 0          | 0         |
| C_F_10                   |                                               | 0         | 0         | 0         | 0         | 0         | 0         | 0         | 0         | 0         | 0         | 0          | 0          | 0          | 0          | 0          | 0         |
| C_F_11                   |                                               | 0         | 0         | 0         | 0         | 0         | 0         | 0         | 0         | 0         | 0         | 0          | 0          | 0          | 0          | 0          | 0         |
| C_F_12                   |                                               | 0         | 0         | 0         | 0         | 0         | 0         | 0         | 0         | 0         | 0         | 0          | 0          | 0          | 0          | 0          | 0         |
| C_F_13                   |                                               | 0         | 0         | 0         | 0         | 0         | 0         | 0         | 0         | 0         | 0         | 0          | 0          | 0          | 0          | 0          | 0         |
| C_F_14                   |                                               | 0         | 0         | 0         | 0         | 0         | 0         | 0         | 0         | 0         | 0         | 0          | 0          | 0          | 0          | 0          | 0         |
| C_F_15                   |                                               | 0         | 0         | 0         | 0         | 0         | 0         | 0         | 0         | 0         | 0         | 0          | 0          | 0          | 0          | 0          | 0         |
| C_F_16                   |                                               | 0         | 0         | 0         | 0         | 0         | 0         | 0         | 0         | 0         | 0         | 0          | 0          | 0          | 0          | 0          | 0         |
| P_CC                     | Probability on cervical cancer after          | 0.001125  | 0.001125  | 0.001125  | 0.001125  | 0.001125  | 0.001125  | 0.001125  | 0.001125  | 0.001125  | 0.001125  | 0.001125   | 0.001125   | 0.001125   | 0.001125   | 0.001125   | 0.001125  |
| I_dur                    | Duration of infectious period (years)         |           |           |           |           |           |           |           |           |           |           |            |            |            |            |            |           |
| Lat_CC                   | CC Latency (years)                            | 10        | 10        | 10        | 10        | 10        | 10        | 10        | 10        | 10        | 10        | 10         | 10         | 10         | 10         | 10         | 10        |
| Vaccination and fatality |                                               |           |           |           |           |           |           |           |           |           |           |            |            |            |            |            |           |
| Vac_Uptake               | Vaccination uptake                            | 0         | 0         | 0         | 0         | 0         | 0         | 0         | 0         | 0         | 0         | 0          | 0          | 0          | 0          | 0          | 0         |
| Vac_Eff_Inf              | Vaccination effectiveness on infecti          | 0.99      | 0.99      | 0.99      | 0.99      | 0.99      | 0.99      | 0.99      | 0.99      | 0.99      | 0.99      | 0.99       | 0.99       | 0.99       | 0.99       | 0.99       | 0.99      |
| f_CCT                    | Fraction of Cervical Cancer patients          | 0.5       | 0.5       | 0.5       | 0.5       | 0.5       | 0.5       | 0.5       | 0.5       | 0.5       | 0.5       | 0.5        | 0.5        | 0.5        | 0.5        | 0.5        | 0.5       |
| CCT_D                    | Fraction of treated Cervical Cancer           | 0.35      | 0.35      | 0.35      | 0.35      | 0.35      | 0.35      | 0.35      | 0.35      | 0.35      | 0.35      | 0.35       | 0.35       | 0.35       | 0.35       | 0.35       | 0.35      |
| CCU_D                    | Fraction of untreated Cervical Canc           | 1         | 1         | 1         | 1         | 1         | 1         | 1         | 1         | 1         | 1         | 1          | 1          | 1          | 1          | 1          | 1         |
| CCT_dur                  | Duration with cervical cancer treat           | 5         | 5         | 5         | 5         | 5         | 5         | 5         | 5         | 5         | 5         | 5          | 5          | 5          | 5          | 5          | 5         |
| CCU_dur                  | Duration with cervical cancer untrea          | 5         | 5         | 5         | 5         | 5         | 5         | 5         | 5         | 5         | 5         | 5          | 5          | 5          | 5          | 5          | 5         |
| Im_dur                   | Immunity duration (years)                     | 10        |           |           |           |           |           |           |           |           |           |            |            |            |            |            |           |
| Economics                |                                               |           |           |           |           |           |           |           |           |           |           |            |            |            |            |            |           |
| Rf                       | Financial discount rate                       | 3.5%      |           |           |           |           |           |           |           |           |           |            |            |            |            |            |           |
| Re                       | effect QALY discount rate                     | 3.5%      |           |           |           |           |           |           |           |           |           |            |            |            |            |            |           |
| CoV                      | Cost of Vaccination                           | 152.00    |           |           |           |           |           |           |           |           |           |            |            |            |            |            |           |
| CoD                      | Cost of premature death                       |           |           |           |           |           |           |           |           |           |           |            |            |            |            |            |           |
| CoPLL                    | Cost of productivity loss                     |           |           |           |           |           |           |           |           |           |           |            |            |            |            |            |           |
| Utility                  | Utility healthy                               | 1         | 1         | 1         | 0.99      | 0.98      | 0.97      | 0.96      | 0.95      | 0.93      | 0.91      | 0.89       | 0.87       | 0.84       | 0.81       | 0.78       | 0.75      |
| Ut_CC                    | Rel Utility cervical cancer                   | 0.62      |           |           |           |           |           |           |           |           |           |            |            |            |            |            |           |
| Ut_UT                    | Relative utility untreated vs treated         | 0.5       |           |           |           |           |           |           |           |           |           |            |            |            |            |            |           |
| CoCaseCCT                | Cost per CC case treated                      | 26250     |           |           |           |           |           |           |           |           |           |            |            |            |            |            |           |

Bilbliography

1. Population Pyramid. Population Pyramids of Iran from 1950 to 2100 [Internet]. PopulationPyramid.net. [cited 2023 Jun 30]. Available from: <https://www.populationpyramid.net/world/2023/>

2. Macrotrends. Iran Birth Rate 1950-2023 [Internet]. [cited 2023 Jun 30]. Available from: <https://www.macrotrends.net/countries/IRN/iran/birth-rate>

3. Macrotrends. Iran Death Rate 1950-2023 [Internet]. 2023 [cited 2023 Jun 30]. Available from: <https://www.macrotrends.net/countries/IRN/iran/death-rate>

4. Darroch JE, Landry DJ, Oslak S. Age differences between sexual partners in the United States. Fam Plann Perspect. 1999;31:160–7.

5. Twenge JM, Sherman RA, Wells BE. Declines in Sexual Frequency among American Adults, 1989–2014. *Arch Sex Behav*. 2017;46:2389–401.
6. Trottier H, Mahmud S, Prado JCM, Sobrinho JS, Costa MC, Rohan TE, et al. Type-Specific Duration of Human Papillomavirus Infection: Implications for Human Papillomavirus Screening and Vaccination. *The Journal of Infectious Diseases*. 2008;197:1436–47.
7. NCI. HPV and Cancer [Internet]. 2019 [cited 2023 Jun 30]. Available from: <https://www.cancer.gov/about-cancer/causes-prevention/risk/infectious-agents/hpv-and-cancer>
8. CDC. HPV Vaccine Safety and Effectiveness | CDC [Internet]. 2022 [cited 2023 Jun 27]. Available from: <https://www.cdc.gov/vaccines/vpd/hpv/hcp/safety-effectiveness.html>
9. Bruni L, Albero G, Serrano B, Mena M, Collado JJ, Gómez D, Muñoz J, Bosch FX, de Sanjosé S. ICO/IARC Information Centre on HPV and Cancer. Human Papillomavirus and Related Diseases in Iran (Islamic Republic of). Summary Report 10 March 2023 [Internet]. Spain: ICO/IARC; 2023. Available from: <https://hpvcentre.net/statistics/reports/IRN.pdf>
10. American Cancer Society. Cancer Facts & Figures 2023. 2023 [cited 2023 Jun 30]; Available from: <https://www.cancer.org/cancer/types/cervical-cancer/detection-diagnosis-staging/survival.html>
11. NICE. Guide to the Methods of Technology Appraisal. London: NICE; 2004.
12. Sargazi N, Takian A, Daroudi R, Nahvijou A, Yaseri M, Ghanbari Motlagh A, et al. Cost-Benefit Analysis of Human Papillomavirus Vaccine in Iran. *J Prev* (2022). 2022;43:841–57.
13. Emrani Z, Akbari Sari A, Zeraati H, Olyaeemanesh A, Daroudi R. Health-related quality of life measured using the EQ-5D–5 L: population norms for the capital of Iran. *Health Qual Life Outcomes*. 2020;18:108.
14. Global Burden of Disease Collaborative Network. Global Burden of Disease Study 2017 (GBD 2017) Disability Weights | GHDx [Internet]. Seattle, United States of America: Institute for Health Metrics and Evaluation (IHME); 2018 [cited 2023 Jun 30]. Available from: <https://ghdx.healthdata.org/record/ihme-data/gbd-2017-disability-weights>
